# Supplementary material
Source: PubMed Central journal article supplement (PMC3180923)
Supplement: NIHMS318180-supplement-Supp_Fig_S1.pdf [file NIHMS318180-supplement-Supp_Fig_S1.pdf]

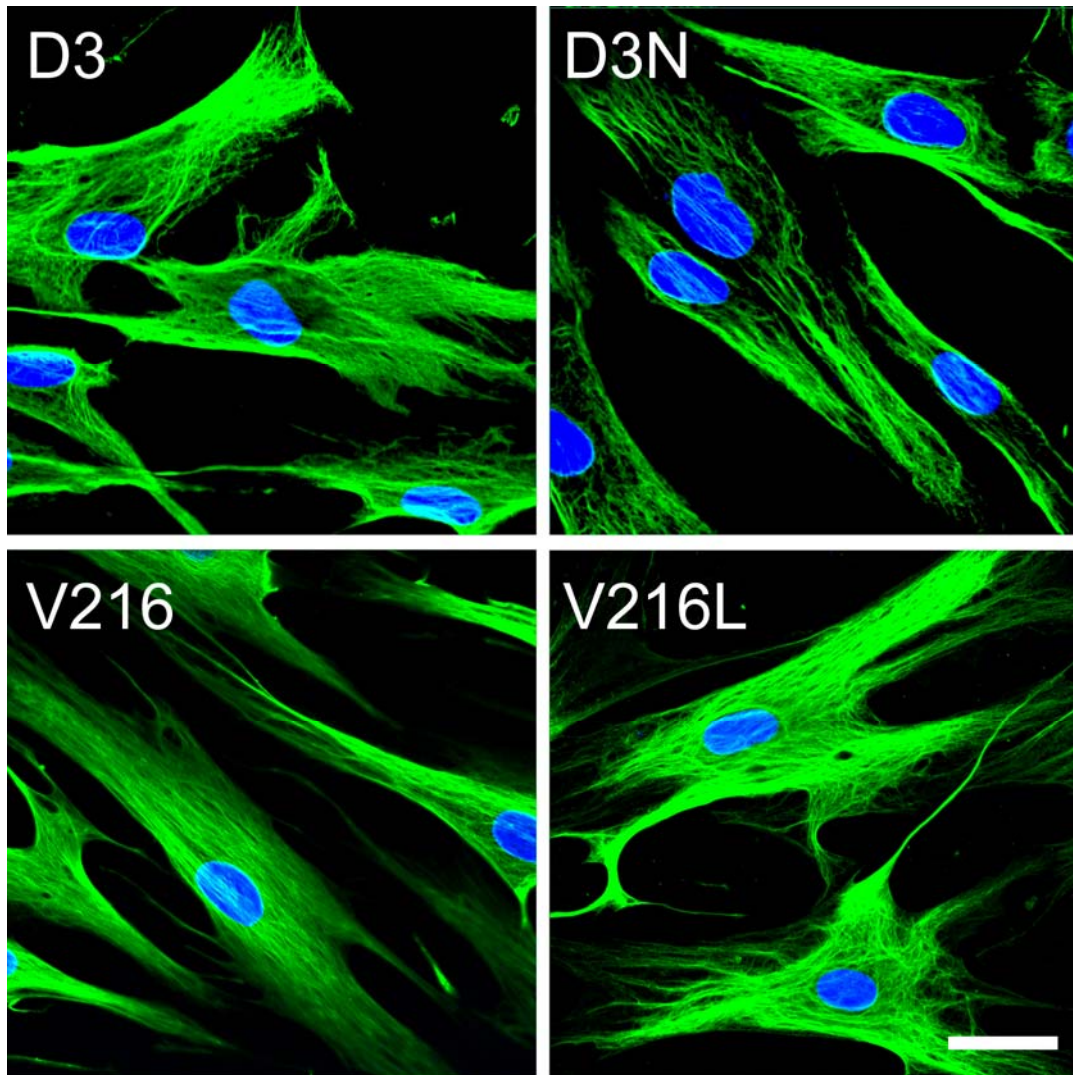

**Supp. Figure S1.** D3, D3N, V216, and V216L cells are fibroblasts. D3, D3N, V216, V216L cells were immunofluorescently labeled with the mesenchymal marker vimentin (green) and stained with DAPI to denote nuclei (blue). Spindle-like morphology and vimentin-positive labeling support the identification of fibroblasts as the human patient derived cells. Bar = 20  $\mu$ m.

**Supp. Movie S1.** (Included as a separate Supporting Information file online) Mutant Cx43 expressing fibroblasts migrate slower than control fibroblasts. Time-lapse imaging of V216 and V216L fibroblast migration was performed to reveal a delay in migration in the V216L fibroblasts. D3N was also delayed in comparison to D3 fibroblasts (movie not shown). One image was acquired every 15 minutes over 48 hours. Images were compiled to correspond to 1 second of video equals 1.5 hours of real-time cell migration.
